# Supplementary material
Source: publisher figshare collection journal article supplement (https://acs.figshare.com/ndownloader/files/5335429)
Supplement: Supplementary file 1 [file 5335429]

  
data_t 
  
_audit_creation_method            SHELXL-97 
_chemical_name_systematic 
; 
 ? 
; 
_chemical_name_common             ? 
_chemical_melting_point           ? 
_chemical_formula_moiety          ? 
_chemical_formula_sum 
 'C29 H37 Cu I N9 O7' 
_chemical_formula_weight          814.12 
  
loop_ 
 _atom_type_symbol 
 _atom_type_description 
 _atom_type_scat_dispersion_real 
 _atom_type_scat_dispersion_imag 
 _atom_type_scat_source 
 'C'  'C'   0.0033   0.0016 
 'International Tables Vol C Tables 4.2.6.8 and 6.1.1.4' 
 'H'  'H'   0.0000   0.0000 
 'International Tables Vol C Tables 4.2.6.8 and 6.1.1.4' 
 'N'  'N'   0.0061   0.0033 
 'International Tables Vol C Tables 4.2.6.8 and 6.1.1.4' 
 'O'  'O'   0.0106   0.0060 
 'International Tables Vol C Tables 4.2.6.8 and 6.1.1.4' 
 'Cu'  'Cu'   0.3201   1.2651 
 'International Tables Vol C Tables 4.2.6.8 and 6.1.1.4' 
 'I'  'I'  -0.4742   1.8119 
 'International Tables Vol C Tables 4.2.6.8 and 6.1.1.4' 
  
_symmetry_cell_setting            Monoclinic 
_symmetry_space_group_name_H-M    P2(1)/c 
  
loop_ 
 _symmetry_equiv_pos_as_xyz 
 'x, y, z' 
 '-x, y+1/2, -z+1/2' 
 '-x, -y, -z' 
 'x, -y-1/2, z-1/2' 
  
_cell_length_a                    17.7642(18) 
_cell_length_b                    24.604(3) 
_cell_length_c                    7.8229(8) 
_cell_angle_alpha                 90.00 
_cell_angle_beta                  99.176(2) 
_cell_angle_gamma                 90.00 
_cell_volume                      3375.4(6) 
_cell_formula_units_Z             4 
_cell_measurement_temperature     298(2) 
_cell_measurement_reflns_used     4653 
_cell_measurement_theta_min       2.47 
_cell_measurement_theta_max       22.49 
  
_exptl_crystal_description        plate 
_exptl_crystal_colour             yellow 
_exptl_crystal_size_max           0.20 
_exptl_crystal_size_mid           0.20 
_exptl_crystal_size_min           0.20 
_exptl_crystal_density_meas       0 
_exptl_crystal_density_diffrn     1.602 
_exptl_crystal_density_method     'not measured' 
_exptl_crystal_F_000              1648 
_exptl_absorpt_coefficient_mu     1.620 
_exptl_absorpt_correction_type    none 
_exptl_absorpt_correction_T_min   0.7376 
_exptl_absorpt_correction_T_max   0.7376 
_exptl_absorpt_process_details    ? 
  
_exptl_special_details 
; 
 ? 
; 
  
_diffrn_ambient_temperature       298(2) 
_diffrn_radiation_wavelength      0.71073 
_diffrn_radiation_type            MoK\a 
_diffrn_radiation_source          'fine-focus sealed tube' 
_diffrn_radiation_monochromator   graphite 
_diffrn_measurement_device_type   'CCD area detector' 
_diffrn_measurement_method        'phi and omega scans' 
_diffrn_detector_area_resol_mean  ? 
_diffrn_standards_number          ? 
_diffrn_standards_interval_count  ? 
_diffrn_standards_interval_time   ? 
_diffrn_standards_decay_%         ? 
_diffrn_reflns_number             26887 
_diffrn_reflns_av_R_equivalents   0.0933 
_diffrn_reflns_av_sigmaI/netI     0.0738 
_diffrn_reflns_limit_h_min        -21 
_diffrn_reflns_limit_h_max        21 
_diffrn_reflns_limit_k_min        -30 
_diffrn_reflns_limit_k_max        29 
_diffrn_reflns_limit_l_min        -9 
_diffrn_reflns_limit_l_max        9 
_diffrn_reflns_theta_min          1.16 
_diffrn_reflns_theta_max          26.00 
_reflns_number_total              6637 
_reflns_number_gt                 4203 
_reflns_threshold_expression      >2sigma(I) 
  
_computing_data_collection        'Bruker SMART' 
_computing_cell_refinement        'Bruker SMART' 
_computing_data_reduction         'Bruker SAINT' 
_computing_structure_solution     'SHELXS-97 (Sheldrick, 1990)' 
_computing_structure_refinement   'SHELXL-97 (Sheldrick, 1997)' 
_computing_molecular_graphics     'Bruker SHELXTL' 
_computing_publication_material   'Bruker SHELXTL' 
  
_refine_special_details 
; 
 Refinement of F^2^ against ALL reflections.  The weighted R-factor wR and 
 goodness of fit S are based on F^2^, conventional R-factors R are based 
 on F, with F set to zero for negative F^2^. The threshold expression of 
 F^2^ > 2sigma(F^2^) is used only for calculating R-factors(gt) etc. and is 
 not relevant to the choice of reflections for refinement.  R-factors based 
 on F^2^ are statistically about twice as large as those based on F, and R- 
 factors based on ALL data will be even larger. 
; 
  
_refine_ls_structure_factor_coef  Fsqd 
_refine_ls_matrix_type            full 
_refine_ls_weighting_scheme       calc 
_refine_ls_weighting_details 
 'calc w=1/[\s^2^(Fo^2^)+(0.1067P)^2^+0.0000P] where P=(Fo^2^+2Fc^2^)/3' 
_atom_sites_solution_primary      direct 
_atom_sites_solution_secondary    difmap 
_atom_sites_solution_hydrogens    geom 
_refine_ls_hydrogen_treatment     mixed 
_refine_ls_extinction_method      none 
_refine_ls_extinction_coef        ? 
_refine_ls_number_reflns          6637 
_refine_ls_number_parameters      504 
_refine_ls_number_restraints      120 
_refine_ls_R_factor_all           0.0956 
_refine_ls_R_factor_gt            0.0623 
_refine_ls_wR_factor_ref          0.1877 
_refine_ls_wR_factor_gt           0.1676 
_refine_ls_goodness_of_fit_ref    0.969 
_refine_ls_restrained_S_all       1.027 
_refine_ls_shift/su_max           0.000 
_refine_ls_shift/su_mean          0.000 
  
loop_ 
 _atom_site_label 
 _atom_site_type_symbol 
 _atom_site_fract_x 
 _atom_site_fract_y 
 _atom_site_fract_z 
 _atom_site_U_iso_or_equiv 
 _atom_site_adp_type 
 _atom_site_occupancy 
 _atom_site_symmetry_multiplicity 
 _atom_site_calc_flag 
 _atom_site_refinement_flags 
 _atom_site_disorder_assembly 
 _atom_site_disorder_group 
Cu1 Cu 0.37042(4) 0.29275(3) 0.89710(10) 0.0554(3) Uani 1 1 d . . . 
I1 I 0.33110(3) 0.291219(18) 0.56297(5) 0.0670(2) Uani 1 1 d . . . 
C1 C 0.5349(4) 0.2745(3) 1.0718(11) 0.088(3) Uani 1 1 d . . . 
H1 H 0.5162 0.2431 1.1168 0.105 Uiso 1 1 calc R . . 
C2 C 0.5182(4) 0.3492(3) 0.9018(11) 0.083(2) Uani 1 1 d . . . 
H2 H 0.4874 0.3711 0.8227 0.099 Uiso 1 1 calc R . . 
C3 C 0.6125(4) 0.2880(3) 1.1222(12) 0.091(3) Uani 1 1 d . . . 
H3 H 0.6445 0.2651 1.1956 0.109 Uiso 1 1 calc R . . 
C4 C 0.5922(4) 0.3639(3) 0.9495(11) 0.083(2) Uani 1 1 d . . . 
H4 H 0.6098 0.3952 0.9019 0.100 Uiso 1 1 calc R . . 
C5 C 0.6405(4) 0.3351(3) 1.0620(9) 0.0591(17) Uani 1 1 d . . . 
N2 N 0.7781(3) 0.3127(2) 1.1509(7) 0.0551(13) Uani 1 1 d . . . 
C7 C 0.7902(4) 0.2851(3) 0.9929(10) 0.0644(19) Uani 1 1 d . A . 
H7A H 0.7411 0.2746 0.9286 0.077 Uiso 1 1 calc R . . 
H7B H 0.8192 0.2522 1.0239 0.077 Uiso 1 1 calc R . . 
C8 C 0.8506(4) 0.3339(3) 1.2409(8) 0.0623(18) Uani 1 1 d . A . 
H8A H 0.8828 0.3037 1.2860 0.075 Uiso 1 1 calc R . . 
H8B H 0.8409 0.3557 1.3386 0.075 Uiso 1 1 calc R . . 
C9 C 0.8847(3) 0.4230(3) 1.1176(8) 0.0521(15) Uani 1 1 d . A . 
C10 C 0.7943(4) 0.3520(3) 0.7503(8) 0.0553(16) Uani 1 1 d . A . 
C11 C 0.9005(3) 0.3428(2) 0.9649(8) 0.0526(15) Uani 1 1 d . A . 
C12 C 0.9639(4) 0.3016(3) 0.9805(11) 0.069(2) Uani 1 1 d D . . 
C13 C 1.0980(10) 0.2969(9) 1.103(3) 0.116(8) Uani 0.573(17) 1 d PDU A 1 
H13A H 1.0823 0.2593 1.1082 0.140 Uiso 0.573(17) 1 calc PR A 1 
H13B H 1.1219 0.3075 1.2183 0.140 Uiso 0.573(17) 1 calc PR A 1 
C14 C 1.1559(13) 0.3013(15) 0.982(5) 0.30(2) Uani 0.573(17) 1 d PDU A 1 
H14A H 1.1372 0.3255 0.8887 0.446 Uiso 0.573(17) 1 calc PR A 1 
H14B H 1.1643 0.2660 0.9360 0.446 Uiso 0.573(17) 1 calc PR A 1 
H14C H 1.2030 0.3150 1.0441 0.446 Uiso 0.573(17) 1 calc PR A 1 
O3 O 0.9651(7) 0.2552(5) 0.9527(19) 0.081(4) Uani 0.573(17) 1 d PU A 1 
O4 O 1.0335(5) 0.3288(5) 1.055(2) 0.095(4) Uani 0.573(17) 1 d PDU A 1 
C14' C 1.1523(8) 0.3054(12) 1.247(4) 0.149(12) Uani 0.427(17) 1 d PDU A 2 
H14D H 1.1665 0.3348 1.1785 0.223 Uiso 0.427(17) 1 calc PR A 2 
H14E H 1.1930 0.2794 1.2668 0.223 Uiso 0.427(17) 1 calc PR A 2 
H14F H 1.1425 0.3192 1.3565 0.223 Uiso 0.427(17) 1 calc PR A 2 
C13' C 1.0805(10) 0.2781(8) 1.152(4) 0.101(8) Uani 0.427(17) 1 d PDU A 2 
H13C H 1.0889 0.2669 1.0381 0.121 Uiso 0.427(17) 1 calc PR A 2 
H13D H 1.0693 0.2460 1.2155 0.121 Uiso 0.427(17) 1 calc PR A 2 
O3' O 0.9697(9) 0.2710(7) 0.8645(18) 0.075(5) Uani 0.427(17) 1 d PDU A 2 
O4' O 1.0182(7) 0.3140(7) 1.1367(15) 0.072(5) Uani 0.427(17) 1 d PDU A 2 
C15 C 0.9116(3) 0.3930(3) 0.8509(8) 0.0512(15) Uani 1 1 d . . . 
C16 C 0.9816(4) 0.3911(4) 0.7747(11) 0.099(3) Uani 1 1 d D A . 
C17 C 1.0503(9) 0.3727(7) 0.544(2) 0.106(6) Uani 0.530(14) 1 d PDU A 1 
H17A H 1.0417 0.3527 0.4357 0.127 Uiso 0.530(14) 1 calc PR A 1 
H17B H 1.0887 0.3534 0.6234 0.127 Uiso 0.530(14) 1 calc PR A 1 
C18 C 1.0798(18) 0.4300(11) 0.512(5) 0.21(2) Uani 0.530(14) 1 d PDU A 1 
H18A H 1.0442 0.4566 0.5400 0.318 Uiso 0.530(14) 1 calc PR A 1 
H18B H 1.0851 0.4336 0.3921 0.318 Uiso 0.530(14) 1 calc PR A 1 
H18C H 1.1284 0.4356 0.5830 0.318 Uiso 0.530(14) 1 calc PR A 1 
O5 O 1.0439(6) 0.4102(6) 0.8800(16) 0.110(5) Uani 0.530(14) 1 d PDU A 1 
O6 O 0.9816(6) 0.3748(6) 0.6142(12) 0.088(4) Uani 0.530(14) 1 d PDU A 1 
C17' C 1.0917(8) 0.4235(9) 0.670(2) 0.140(10) Uani 0.470(14) 1 d PDU A 2 
H17C H 1.1167 0.3889 0.6994 0.168 Uiso 0.470(14) 1 calc PR A 2 
H17D H 1.1294 0.4521 0.6960 0.168 Uiso 0.470(14) 1 calc PR A 2 
C18' C 1.0589(14) 0.4245(9) 0.474(2) 0.094(8) Uani 0.470(14) 1 d PDU A 2 
H18D H 1.0299 0.3920 0.4440 0.142 Uiso 0.470(14) 1 calc PR A 2 
H18E H 1.1000 0.4265 0.4083 0.142 Uiso 0.470(14) 1 calc PR A 2 
H18F H 1.0265 0.4557 0.4493 0.142 Uiso 0.470(14) 1 calc PR A 2 
O6' O 1.0316(8) 0.4312(5) 0.771(2) 0.113(6) Uani 0.470(14) 1 d PDU A 2 
O5' O 0.9834(8) 0.3450(5) 0.670(2) 0.099(5) Uani 0.470(14) 1 d PDU A 2 
C19 C 0.8855(4) 0.4907(3) 0.8825(8) 0.0598(17) Uani 1 1 d . . . 
H19A H 0.8767 0.5167 0.9704 0.072 Uiso 1 1 calc R A . 
H19B H 0.9271 0.5043 0.8280 0.072 Uiso 1 1 calc R . . 
C20 C 0.8233(4) 0.4429(3) 0.6321(8) 0.0604(17) Uani 1 1 d . . . 
H20A H 0.7748 0.4387 0.5565 0.072 Uiso 1 1 calc R A . 
H20B H 0.8612 0.4524 0.5606 0.072 Uiso 1 1 calc R . . 
N7 N 0.8172(3) 0.4871(2) 0.7530(7) 0.0573(13) Uani 1 1 d . A . 
C22 C 0.7267(3) 0.5376(2) 0.9025(8) 0.0511(14) Uani 1 1 d . A . 
C23 C 0.7111(4) 0.5423(3) 1.0673(8) 0.0646(18) Uani 1 1 d . . . 
H23 H 0.7165 0.5122 1.1402 0.077 Uiso 1 1 calc R . . 
C24 C 0.7195(4) 0.5831(3) 0.8029(9) 0.071(2) Uani 1 1 d . . . 
H24 H 0.7317 0.5822 0.6917 0.085 Uiso 1 1 calc R . . 
C25 C 0.6874(4) 0.5913(3) 1.1266(9) 0.070(2) Uani 1 1 d . . . 
H25 H 0.6779 0.5932 1.2400 0.085 Uiso 1 1 calc R . . 
C26 C 0.6936(4) 0.6314(3) 0.8675(8) 0.0643(18) Uani 1 1 d . . . 
H26 H 0.6870 0.6616 0.7955 0.077 Uiso 1 1 calc R . . 
C27 C 0.6051(8) 0.4340(7) 0.4225(16) 0.143(5) Uani 1 1 d . . . 
H27 H 0.6260 0.4059 0.4945 0.172 Uiso 1 1 calc R . . 
C28 C 0.4900(9) 0.3869(6) 0.3995(18) 0.184(6) Uani 1 1 d . . . 
H28A H 0.5224 0.3635 0.4774 0.276 Uiso 1 1 calc R . . 
H28B H 0.4706 0.3673 0.2957 0.276 Uiso 1 1 calc R . . 
H28C H 0.4482 0.3991 0.4538 0.276 Uiso 1 1 calc R . . 
C29 C 0.4953(8) 0.4702(6) 0.242(2) 0.194(7) Uani 1 1 d . . . 
H29A H 0.4545 0.4864 0.2909 0.290 Uiso 1 1 calc R . . 
H29B H 0.4748 0.4521 0.1357 0.290 Uiso 1 1 calc R . . 
H29C H 0.5302 0.4980 0.2184 0.290 Uiso 1 1 calc R . . 
N1 N 0.4869(3) 0.3052(2) 0.9614(7) 0.0574(13) Uani 1 1 d . . . 
C6 C 0.7213(4) 0.3548(3) 1.1259(10) 0.0668(18) Uani 1 1 d . . . 
H6A H 0.7352 0.3808 1.0431 0.080 Uiso 1 1 calc R . . 
H6B H 0.7218 0.3738 1.2348 0.080 Uiso 1 1 calc R . . 
N3 N 0.8914(3) 0.3671(2) 1.1305(6) 0.0508(12) Uani 1 1 d . . . 
N4 N 0.8306(3) 0.3181(2) 0.8805(7) 0.0528(13) Uani 1 1 d . . . 
N5 N 0.9080(3) 0.4387(2) 0.9660(6) 0.0534(13) Uani 1 1 d . A . 
N6 N 0.8444(3) 0.3913(2) 0.7175(6) 0.0535(13) Uani 1 1 d . A . 
C21 C 0.7473(4) 0.4844(2) 0.8292(8) 0.0575(16) Uani 1 1 d . . . 
H21A H 0.7536 0.4573 0.9205 0.069 Uiso 1 1 calc R A . 
H21B H 0.7056 0.4727 0.7412 0.069 Uiso 1 1 calc R . . 
N8 N 0.6776(3) 0.6360(2) 1.0294(6) 0.0545(13) Uani 1 1 d . . . 
N9 N 0.5331(5) 0.4330(4) 0.3569(11) 0.113(3) Uani 1 1 d . . . 
O1 O 0.8649(3) 0.45276(19) 1.2266(5) 0.0676(13) Uani 1 1 d . . . 
O2 O 0.7293(3) 0.34623(19) 0.6748(6) 0.0734(13) Uani 1 1 d . . . 
O7 O 0.6461(6) 0.4722(5) 0.3893(15) 0.204(6) Uani 1 1 d . . . 
  
loop_ 
 _atom_site_aniso_label 
 _atom_site_aniso_U_11 
 _atom_site_aniso_U_22 
 _atom_site_aniso_U_33 
 _atom_site_aniso_U_23 
 _atom_site_aniso_U_13 
 _atom_site_aniso_U_12 
Cu1 0.0557(5) 0.0585(5) 0.0515(5) 0.0018(3) 0.0069(4) 0.0041(3) 
I1 0.0972(4) 0.0647(3) 0.0381(3) 0.00004(19) 0.0076(2) 0.0217(2) 
C1 0.068(5) 0.083(5) 0.103(6) 0.039(5) -0.014(5) -0.020(4) 
C2 0.060(5) 0.098(6) 0.088(6) 0.041(5) 0.003(4) -0.005(4) 
C3 0.061(5) 0.094(6) 0.107(7) 0.041(5) -0.020(5) -0.004(4) 
C4 0.076(6) 0.082(5) 0.092(6) 0.030(5) 0.014(5) -0.016(4) 
C5 0.053(4) 0.058(4) 0.069(4) 0.009(3) 0.017(3) -0.005(3) 
N2 0.044(3) 0.055(3) 0.065(4) -0.005(3) 0.003(3) 0.000(2) 
C7 0.047(4) 0.060(4) 0.084(5) -0.008(4) 0.004(4) -0.014(3) 
C8 0.060(4) 0.072(5) 0.054(4) 0.002(3) 0.006(3) 0.000(3) 
C9 0.044(3) 0.059(4) 0.051(4) -0.009(3) -0.003(3) -0.008(3) 
C10 0.050(4) 0.059(4) 0.054(4) -0.022(3) 0.001(3) -0.001(3) 
C11 0.047(3) 0.057(4) 0.053(4) -0.009(3) 0.004(3) 0.001(3) 
C12 0.051(4) 0.062(5) 0.093(6) -0.013(4) 0.007(4) 0.005(3) 
C13 0.105(11) 0.112(11) 0.129(12) -0.034(9) 0.010(8) 0.027(8) 
C14 0.29(3) 0.29(3) 0.31(3) 0.007(11) 0.036(11) -0.017(11) 
O3 0.077(6) 0.077(7) 0.082(7) -0.027(6) -0.011(6) 0.023(5) 
O4 0.074(6) 0.104(8) 0.100(8) -0.031(6) -0.006(6) 0.039(5) 
C14' 0.136(15) 0.153(15) 0.153(15) 0.007(10) 0.009(10) 0.007(10) 
C13' 0.104(12) 0.094(11) 0.101(11) 0.021(9) 0.008(9) 0.020(9) 
O3' 0.072(7) 0.078(8) 0.075(8) -0.020(7) 0.014(7) 0.025(6) 
O4' 0.057(7) 0.077(7) 0.085(8) -0.009(7) 0.019(6) 0.020(6) 
C15 0.035(3) 0.066(4) 0.052(4) -0.014(3) 0.006(3) -0.005(3) 
C16 0.063(6) 0.121(8) 0.119(8) 0.022(7) 0.029(6) 0.018(5) 
C17 0.112(10) 0.106(10) 0.111(10) -0.021(8) 0.050(8) 0.001(8) 
C18 0.21(2) 0.22(2) 0.21(2) 0.001(10) 0.045(11) -0.007(10) 
O5 0.080(7) 0.131(9) 0.132(9) -0.006(7) 0.054(7) -0.019(6) 
O6 0.072(6) 0.129(9) 0.074(7) 0.011(6) 0.048(5) -0.010(6) 
C17' 0.129(13) 0.149(13) 0.143(13) -0.018(9) 0.028(9) -0.008(9) 
C18' 0.093(10) 0.101(11) 0.098(11) 0.029(8) 0.042(8) -0.002(8) 
O6' 0.103(8) 0.141(10) 0.113(9) 0.007(7) 0.073(7) -0.010(7) 
O5' 0.095(8) 0.137(9) 0.076(7) 0.008(7) 0.051(6) 0.008(7) 
C19 0.066(4) 0.061(4) 0.054(4) -0.012(3) 0.016(3) -0.020(3) 
C20 0.063(4) 0.078(5) 0.043(3) -0.008(3) 0.016(3) 0.000(3) 
N7 0.069(4) 0.059(3) 0.046(3) -0.005(2) 0.015(3) -0.004(3) 
C22 0.056(4) 0.051(4) 0.047(3) 0.005(3) 0.011(3) 0.003(3) 
C23 0.085(5) 0.061(4) 0.050(4) 0.017(3) 0.018(3) 0.024(4) 
C24 0.111(6) 0.060(4) 0.046(4) -0.006(3) 0.029(4) 0.001(4) 
C25 0.104(6) 0.065(5) 0.047(4) 0.018(3) 0.026(4) 0.025(4) 
C26 0.095(5) 0.054(4) 0.046(4) 0.009(3) 0.016(4) 0.004(4) 
C27 0.105(10) 0.216(16) 0.103(9) -0.013(9) -0.001(8) 0.013(9) 
C28 0.199(16) 0.198(16) 0.153(13) 0.001(11) 0.021(11) -0.042(13) 
C29 0.167(14) 0.231(17) 0.165(14) 0.034(13) -0.028(11) 0.058(12) 
N1 0.048(3) 0.067(3) 0.055(3) 0.004(3) 0.002(3) -0.006(3) 
C6 0.060(4) 0.061(4) 0.078(5) 0.003(4) 0.008(4) -0.008(3) 
N3 0.048(3) 0.052(3) 0.050(3) -0.011(2) -0.002(2) -0.004(2) 
N4 0.045(3) 0.054(3) 0.055(3) -0.014(3) -0.004(2) -0.003(2) 
N5 0.057(3) 0.053(3) 0.051(3) -0.010(2) 0.011(2) -0.019(2) 
N6 0.061(3) 0.053(3) 0.047(3) -0.014(2) 0.012(3) 0.002(3) 
C21 0.069(4) 0.051(4) 0.053(4) -0.005(3) 0.010(3) -0.004(3) 
N8 0.067(3) 0.057(3) 0.040(3) 0.000(2) 0.010(2) 0.011(3) 
N9 0.078(6) 0.172(9) 0.087(6) 0.000(6) 0.007(5) -0.015(6) 
O1 0.092(4) 0.063(3) 0.047(3) -0.018(2) 0.012(2) -0.007(2) 
O2 0.063(3) 0.079(3) 0.070(3) -0.017(2) -0.014(2) -0.010(2) 
O7 0.124(7) 0.276(14) 0.210(11) 0.100(10) 0.019(6) -0.047(8) 
  
_geom_special_details 
; 
 All esds (except the esd in the dihedral angle between two l.s. planes) 
 are estimated using the full covariance matrix.  The cell esds are taken 
 into account individually in the estimation of esds in distances, angles 
 and torsion angles; correlations between esds in cell parameters are only 
 used when they are defined by crystal symmetry.  An approximate (isotropic) 
 treatment of cell esds is used for estimating esds involving l.s. planes. 
; 
  
loop_ 
 _geom_bond_atom_site_label_1 
 _geom_bond_atom_site_label_2 
 _geom_bond_distance 
 _geom_bond_site_symmetry_2 
 _geom_bond_publ_flag 
Cu1 N8 2.071(5) 3_667 ? 
Cu1 N1 2.072(5) . ? 
Cu1 I1 2.5940(9) 4_566 ? 
Cu1 I1 2.5960(9) . ? 
I1 Cu1 2.5940(9) 4_565 ? 
C1 N1 1.345(9) . ? 
C1 C3 1.412(10) . ? 
C1 H1 0.9300 . ? 
C2 N1 1.335(9) . ? 
C2 C4 1.358(10) . ? 
C2 H2 0.9300 . ? 
C3 C5 1.373(9) . ? 
C3 H3 0.9300 . ? 
C4 C5 1.332(9) . ? 
C4 H4 0.9300 . ? 
C5 C6 1.522(9) . ? 
N2 C6 1.438(8) . ? 
N2 C7 1.456(9) . ? 
N2 C8 1.462(8) . ? 
C7 N4 1.465(8) . ? 
C7 H7A 0.9700 . ? 
C7 H7B 0.9700 . ? 
C8 N3 1.462(8) . ? 
C8 H8A 0.9700 . ? 
C8 H8B 0.9700 . ? 
C9 O1 1.218(7) . ? 
C9 N5 1.372(8) . ? 
C9 N3 1.383(8) . ? 
C10 O2 1.219(7) . ? 
C10 N6 1.366(8) . ? 
C10 N4 1.392(8) . ? 
C11 N4 1.445(7) . ? 
C11 N3 1.459(7) . ? 
C11 C12 1.505(9) . ? 
C11 C15 1.554(9) . ? 
C12 O3 1.163(12) . ? 
C12 O3' 1.197(13) . ? 
C12 O4 1.445(9) . ? 
C12 O4' 1.463(9) . ? 
C13 O4 1.389(7) . ? 
C13 C14 1.509(11) . ? 
C13 H13A 0.9700 . ? 
C13 H13B 0.9700 . ? 
C14 H14A 0.9600 . ? 
C14 H14B 0.9600 . ? 
C14 H14C 0.9600 . ? 
C14' C13' 1.526(11) . ? 
C14' H14D 0.9600 . ? 
C14' H14E 0.9600 . ? 
C14' H14F 0.9600 . ? 
C13' O4' 1.405(10) . ? 
C13' H13C 0.9700 . ? 
C13' H13D 0.9700 . ? 
C15 N5 1.448(7) . ? 
C15 N6 1.456(7) . ? 
C15 C16 1.463(8) . ? 
C16 O6 1.318(8) . ? 
C16 O6' 1.332(8) . ? 
C16 O5 1.353(8) . ? 
C16 O5' 1.400(9) . ? 
C17 O6 1.417(9) . ? 
C17 C18 1.540(10) . ? 
C17 H17A 0.9700 . ? 
C17 H17B 0.9700 . ? 
C18 H18A 0.9600 . ? 
C18 H18B 0.9600 . ? 
C18 H18C 0.9600 . ? 
C17' O6' 1.439(9) . ? 
C17' C18' 1.547(11) . ? 
C17' H17C 0.9700 . ? 
C17' H17D 0.9700 . ? 
C18' H18D 0.9600 . ? 
C18' H18E 0.9600 . ? 
C18' H18F 0.9600 . ? 
C19 N7 1.453(8) . ? 
C19 N5 1.463(8) . ? 
C19 H19A 0.9700 . ? 
C19 H19B 0.9700 . ? 
C20 N6 1.456(8) . ? 
C20 N7 1.457(8) . ? 
C20 H20A 0.9700 . ? 
C20 H20B 0.9700 . ? 
N7 C21 1.463(8) . ? 
C22 C24 1.360(9) . ? 
C22 C23 1.365(8) . ? 
C22 C21 1.498(8) . ? 
C23 C25 1.382(9) . ? 
C23 H23 0.9300 . ? 
C24 C26 1.396(9) . ? 
C24 H24 0.9300 . ? 
C25 N8 1.332(8) . ? 
C25 H25 0.9300 . ? 
C26 N8 1.346(8) . ? 
C26 H26 0.9300 . ? 
C27 O7 1.243(16) . ? 
C27 N9 1.300(13) . ? 
C27 H27 0.9300 . ? 
C28 N9 1.437(14) . ? 
C28 H28A 0.9600 . ? 
C28 H28B 0.9600 . ? 
C28 H28C 0.9600 . ? 
C29 N9 1.382(13) . ? 
C29 H29A 0.9600 . ? 
C29 H29B 0.9600 . ? 
C29 H29C 0.9600 . ? 
C6 H6A 0.9700 . ? 
C6 H6B 0.9700 . ? 
C21 H21A 0.9700 . ? 
C21 H21B 0.9700 . ? 
N8 Cu1 2.071(5) 3_667 ? 
  
loop_ 
 _geom_angle_atom_site_label_1 
 _geom_angle_atom_site_label_2 
 _geom_angle_atom_site_label_3 
 _geom_angle 
 _geom_angle_site_symmetry_1 
 _geom_angle_site_symmetry_3 
 _geom_angle_publ_flag 
N8 Cu1 N1 104.3(2) 3_667 . ? 
N8 Cu1 I1 112.32(15) 3_667 4_566 ? 
N1 Cu1 I1 109.52(16) . 4_566 ? 
N8 Cu1 I1 103.59(14) 3_667 . ? 
N1 Cu1 I1 110.15(15) . . ? 
I1 Cu1 I1 116.19(3) 4_566 . ? 
Cu1 I1 Cu1 117.68(3) 4_565 . ? 
N1 C1 C3 122.6(7) . . ? 
N1 C1 H1 118.7 . . ? 
C3 C1 H1 118.7 . . ? 
N1 C2 C4 124.0(7) . . ? 
N1 C2 H2 118.0 . . ? 
C4 C2 H2 118.0 . . ? 
C5 C3 C1 119.6(7) . . ? 
C5 C3 H3 120.2 . . ? 
C1 C3 H3 120.2 . . ? 
C5 C4 C2 122.2(7) . . ? 
C5 C4 H4 118.9 . . ? 
C2 C4 H4 118.9 . . ? 
C4 C5 C3 116.5(7) . . ? 
C4 C5 C6 121.4(6) . . ? 
C3 C5 C6 122.1(6) . . ? 
C6 N2 C7 114.6(6) . . ? 
C6 N2 C8 110.7(5) . . ? 
C7 N2 C8 109.7(5) . . ? 
N2 C7 N4 113.8(5) . . ? 
N2 C7 H7A 108.8 . . ? 
N4 C7 H7A 108.8 . . ? 
N2 C7 H7B 108.8 . . ? 
N4 C7 H7B 108.8 . . ? 
H7A C7 H7B 107.7 . . ? 
N2 C8 N3 113.3(5) . . ? 
N2 C8 H8A 108.9 . . ? 
N3 C8 H8A 108.9 . . ? 
N2 C8 H8B 108.9 . . ? 
N3 C8 H8B 108.9 . . ? 
H8A C8 H8B 107.7 . . ? 
O1 C9 N5 126.6(6) . . ? 
O1 C9 N3 125.3(6) . . ? 
N5 C9 N3 108.0(5) . . ? 
O2 C10 N6 125.9(7) . . ? 
O2 C10 N4 125.3(6) . . ? 
N6 C10 N4 108.8(5) . . ? 
N4 C11 N3 111.6(5) . . ? 
N4 C11 C12 109.3(5) . . ? 
N3 C11 C12 113.1(5) . . ? 
N4 C11 C15 104.5(5) . . ? 
N3 C11 C15 103.1(5) . . ? 
C12 C11 C15 114.9(5) . . ? 
O3 C12 O3' 40.0(8) . . ? 
O3 C12 O4 119.3(9) . . ? 
O3' C12 O4 115.0(10) . . ? 
O3 C12 O4' 109.4(10) . . ? 
O3' C12 O4' 129.7(10) . . ? 
O4 C12 O4' 32.8(7) . . ? 
O3 C12 C11 133.0(8) . . ? 
O3' C12 C11 121.1(9) . . ? 
O4 C12 C11 107.6(7) . . ? 
O4' C12 C11 108.2(7) . . ? 
O4 C13 C14 113.8(11) . . ? 
O4 C13 H13A 108.8 . . ? 
C14 C13 H13A 108.8 . . ? 
O4 C13 H13B 108.8 . . ? 
C14 C13 H13B 108.8 . . ? 
H13A C13 H13B 107.7 . . ? 
C13 O4 C12 117.6(12) . . ? 
C13' C14' H14D 109.5 . . ? 
C13' C14' H14E 109.5 . . ? 
H14D C14' H14E 109.5 . . ? 
C13' C14' H14F 109.5 . . ? 
H14D C14' H14F 109.5 . . ? 
H14E C14' H14F 109.5 . . ? 
O4' C13' C14' 110.6(10) . . ? 
O4' C13' H13C 109.5 . . ? 
C14' C13' H13C 109.5 . . ? 
O4' C13' H13D 109.5 . . ? 
C14' C13' H13D 109.5 . . ? 
H13C C13' H13D 108.1 . . ? 
C13' O4' C12 110.3(12) . . ? 
N5 C15 N6 110.8(5) . . ? 
N5 C15 C16 113.7(6) . . ? 
N6 C15 C16 111.1(6) . . ? 
N5 C15 C11 103.8(5) . . ? 
N6 C15 C11 102.9(5) . . ? 
C16 C15 C11 113.7(6) . . ? 
O6 C16 O6' 95.9(8) . . ? 
O6 C16 O5 124.2(8) . . ? 
O6' C16 O5 43.4(8) . . ? 
O6 C16 O5' 36.4(6) . . ? 
O6' C16 O5' 120.7(8) . . ? 
O5 C16 O5' 122.9(10) . . ? 
O6 C16 C15 121.8(7) . . ? 
O6' C16 C15 126.8(8) . . ? 
O5 C16 C15 114.0(8) . . ? 
O5' C16 C15 111.3(8) . . ? 
O6 C17 C18 111.5(10) . . ? 
O6 C17 H17A 109.3 . . ? 
C18 C17 H17A 109.3 . . ? 
O6 C17 H17B 109.3 . . ? 
C18 C17 H17B 109.3 . . ? 
H17A C17 H17B 108.0 . . ? 
C16 O6 C17 120.7(9) . . ? 
O6' C17' C18' 110.2(10) . . ? 
O6' C17' H17C 109.6 . . ? 
C18' C17' H17C 109.6 . . ? 
O6' C17' H17D 109.6 . . ? 
C18' C17' H17D 109.6 . . ? 
H17C C17' H17D 108.1 . . ? 
C17' C18' H18D 109.5 . . ? 
C17' C18' H18E 109.5 . . ? 
H18D C18' H18E 109.5 . . ? 
C17' C18' H18F 109.5 . . ? 
H18D C18' H18F 109.5 . . ? 
H18E C18' H18F 109.5 . . ? 
C16 O6' C17' 118.1(10) . . ? 
N7 C19 N5 113.4(5) . . ? 
N7 C19 H19A 108.9 . . ? 
N5 C19 H19A 108.9 . . ? 
N7 C19 H19B 108.9 . . ? 
N5 C19 H19B 108.9 . . ? 
H19A C19 H19B 107.7 . . ? 
N6 C20 N7 113.2(5) . . ? 
N6 C20 H20A 108.9 . . ? 
N7 C20 H20A 108.9 . . ? 
N6 C20 H20B 108.9 . . ? 
N7 C20 H20B 108.9 . . ? 
H20A C20 H20B 107.8 . . ? 
C19 N7 C20 110.9(5) . . ? 
C19 N7 C21 112.8(5) . . ? 
C20 N7 C21 112.7(5) . . ? 
C24 C22 C23 117.1(6) . . ? 
C24 C22 C21 120.5(6) . . ? 
C23 C22 C21 122.3(6) . . ? 
C22 C23 C25 120.6(6) . . ? 
C22 C23 H23 119.7 . . ? 
C25 C23 H23 119.7 . . ? 
C22 C24 C26 120.0(6) . . ? 
C22 C24 H24 120.0 . . ? 
C26 C24 H24 120.0 . . ? 
N8 C25 C23 123.2(6) . . ? 
N8 C25 H25 118.4 . . ? 
C23 C25 H25 118.4 . . ? 
N8 C26 C24 122.9(6) . . ? 
N8 C26 H26 118.5 . . ? 
C24 C26 H26 118.5 . . ? 
O7 C27 N9 120.3(15) . . ? 
O7 C27 H27 119.9 . . ? 
N9 C27 H27 119.9 . . ? 
N9 C28 H28A 109.5 . . ? 
N9 C28 H28B 109.5 . . ? 
H28A C28 H28B 109.5 . . ? 
N9 C28 H28C 109.5 . . ? 
H28A C28 H28C 109.5 . . ? 
H28B C28 H28C 109.5 . . ? 
N9 C29 H29A 109.5 . . ? 
N9 C29 H29B 109.5 . . ? 
H29A C29 H29B 109.5 . . ? 
N9 C29 H29C 109.5 . . ? 
H29A C29 H29C 109.5 . . ? 
H29B C29 H29C 109.5 . . ? 
C2 N1 C1 115.0(6) . . ? 
C2 N1 Cu1 119.3(5) . . ? 
C1 N1 Cu1 125.4(5) . . ? 
N2 C6 C5 114.7(6) . . ? 
N2 C6 H6A 108.6 . . ? 
C5 C6 H6A 108.6 . . ? 
N2 C6 H6B 108.6 . . ? 
C5 C6 H6B 108.6 . . ? 
H6A C6 H6B 107.6 . . ? 
C9 N3 C11 111.3(5) . . ? 
C9 N3 C8 123.6(5) . . ? 
C11 N3 C8 115.6(5) . . ? 
C10 N4 C11 110.3(5) . . ? 
C10 N4 C7 123.8(5) . . ? 
C11 N4 C7 115.2(5) . . ? 
C9 N5 C15 111.6(5) . . ? 
C9 N5 C19 122.2(5) . . ? 
C15 N5 C19 115.9(5) . . ? 
C10 N6 C20 125.2(5) . . ? 
C10 N6 C15 111.7(5) . . ? 
C20 N6 C15 115.2(5) . . ? 
N7 C21 C22 113.0(5) . . ? 
N7 C21 H21A 109.0 . . ? 
C22 C21 H21A 109.0 . . ? 
N7 C21 H21B 109.0 . . ? 
C22 C21 H21B 109.0 . . ? 
H21A C21 H21B 107.8 . . ? 
C25 N8 C26 116.1(5) . . ? 
C25 N8 Cu1 124.2(4) . 3_667 ? 
C26 N8 Cu1 119.4(4) . 3_667 ? 
C27 N9 C29 126.2(13) . . ? 
C27 N9 C28 116.7(13) . . ? 
C29 N9 C28 117.0(11) . . ? 
  
loop_ 
 _geom_torsion_atom_site_label_1 
 _geom_torsion_atom_site_label_2 
 _geom_torsion_atom_site_label_3 
 _geom_torsion_atom_site_label_4 
 _geom_torsion 
 _geom_torsion_site_symmetry_1 
 _geom_torsion_site_symmetry_2 
 _geom_torsion_site_symmetry_3 
 _geom_torsion_site_symmetry_4 
 _geom_torsion_publ_flag 
N8 Cu1 I1 Cu1 -177.07(15) 3_667 . . 4_565 ? 
N1 Cu1 I1 Cu1 71.84(17) . . . 4_565 ? 
I1 Cu1 I1 Cu1 -53.40(6) 4_566 . . 4_565 ? 
N1 C1 C3 C5 2.3(15) . . . . ? 
N1 C2 C4 C5 -0.1(14) . . . . ? 
C2 C4 C5 C3 2.9(13) . . . . ? 
C2 C4 C5 C6 -174.5(8) . . . . ? 
C1 C3 C5 C4 -3.8(13) . . . . ? 
C1 C3 C5 C6 173.5(8) . . . . ? 
C6 N2 C7 N4 72.6(7) . . . . ? 
C8 N2 C7 N4 -52.6(7) . . . . ? 
C6 N2 C8 N3 -75.2(7) . . . . ? 
C7 N2 C8 N3 52.2(7) . . . . ? 
N4 C11 C12 O3 -7.7(17) . . . . ? 
N3 C11 C12 O3 117.4(15) . . . . ? 
C15 C11 C12 O3 -124.7(15) . . . . ? 
N4 C11 C12 O3' 41.0(15) . . . . ? 
N3 C11 C12 O3' 166.0(13) . . . . ? 
C15 C11 C12 O3' -76.1(14) . . . . ? 
N4 C11 C12 O4 176.2(9) . . . . ? 
N3 C11 C12 O4 -58.8(10) . . . . ? 
C15 C11 C12 O4 59.1(10) . . . . ? 
N4 C11 C12 O4' -149.3(9) . . . . ? 
N3 C11 C12 O4' -24.3(11) . . . . ? 
C15 C11 C12 O4' 93.6(10) . . . . ? 
C14 C13 O4 C12 106(2) . . . . ? 
O3 C12 O4 C13 -5.4(19) . . . . ? 
O3' C12 O4 C13 -50.4(18) . . . . ? 
O4' C12 O4 C13 74.9(19) . . . . ? 
C11 C12 O4 C13 171.4(12) . . . . ? 
C14' C13' O4' C12 151(2) . . . . ? 
O3 C12 O4' C13' 31.6(19) . . . . ? 
O3' C12 O4' C13' -9(2) . . . . ? 
O4 C12 O4' C13' -82.7(18) . . . . ? 
C11 C12 O4' C13' -177.1(14) . . . . ? 
N4 C11 C15 N5 117.3(5) . . . . ? 
N3 C11 C15 N5 0.5(5) . . . . ? 
C12 C11 C15 N5 -122.9(5) . . . . ? 
N4 C11 C15 N6 1.7(6) . . . . ? 
N3 C11 C15 N6 -115.1(5) . . . . ? 
C12 C11 C15 N6 121.5(5) . . . . ? 
N4 C11 C15 C16 -118.6(6) . . . . ? 
N3 C11 C15 C16 124.6(6) . . . . ? 
C12 C11 C15 C16 1.2(8) . . . . ? 
N5 C15 C16 O6 -143.2(11) . . . . ? 
N6 C15 C16 O6 -17.4(14) . . . . ? 
C11 C15 C16 O6 98.3(12) . . . . ? 
N5 C15 C16 O6' -15.3(15) . . . . ? 
N6 C15 C16 O6' 110.6(13) . . . . ? 
C11 C15 C16 O6' -133.8(13) . . . . ? 
N5 C15 C16 O5 33.4(12) . . . . ? 
N6 C15 C16 O5 159.3(10) . . . . ? 
C11 C15 C16 O5 -85.1(11) . . . . ? 
N5 C15 C16 O5' 177.6(10) . . . . ? 
N6 C15 C16 O5' -56.6(12) . . . . ? 
C11 C15 C16 O5' 59.1(12) . . . . ? 
O6' C16 O6 C17 40.2(18) . . . . ? 
O5 C16 O6 C17 5(2) . . . . ? 
O5' C16 O6 C17 -96(2) . . . . ? 
C15 C16 O6 C17 -179.1(12) . . . . ? 
C18 C17 O6 C16 -71(2) . . . . ? 
O6 C16 O6' C17' -34.4(17) . . . . ? 
O5 C16 O6' C17' 101(2) . . . . ? 
O5' C16 O6' C17' -6(2) . . . . ? 
C15 C16 O6' C17' -172.0(11) . . . . ? 
C18' C17' O6' C16 71(2) . . . . ? 
N5 C19 N7 C20 -50.2(7) . . . . ? 
N5 C19 N7 C21 77.3(6) . . . . ? 
N6 C20 N7 C19 51.7(7) . . . . ? 
N6 C20 N7 C21 -75.9(7) . . . . ? 
C24 C22 C23 C25 1.3(10) . . . . ? 
C21 C22 C23 C25 -175.7(6) . . . . ? 
C23 C22 C24 C26 -2.9(11) . . . . ? 
C21 C22 C24 C26 174.2(6) . . . . ? 
C22 C23 C25 N8 0.8(12) . . . . ? 
C22 C24 C26 N8 2.6(11) . . . . ? 
C4 C2 N1 C1 -1.6(12) . . . . ? 
C4 C2 N1 Cu1 173.4(7) . . . . ? 
C3 C1 N1 C2 0.5(13) . . . . ? 
C3 C1 N1 Cu1 -174.1(7) . . . . ? 
N8 Cu1 N1 C2 -53.9(6) 3_667 . . . ? 
I1 Cu1 N1 C2 -174.3(6) 4_566 . . . ? 
I1 Cu1 N1 C2 56.7(6) . . . . ? 
N8 Cu1 N1 C1 120.5(7) 3_667 . . . ? 
I1 Cu1 N1 C1 0.1(7) 4_566 . . . ? 
I1 Cu1 N1 C1 -128.9(6) . . . . ? 
C7 N2 C6 C5 65.5(8) . . . . ? 
C8 N2 C6 C5 -169.8(6) . . . . ? 
C4 C5 C6 N2 -143.1(7) . . . . ? 
C3 C5 C6 N2 39.6(10) . . . . ? 
O1 C9 N3 C11 168.1(6) . . . . ? 
N5 C9 N3 C11 -15.1(6) . . . . ? 
O1 C9 N3 C8 23.4(9) . . . . ? 
N5 C9 N3 C8 -159.8(5) . . . . ? 
N4 C11 N3 C9 -102.9(6) . . . . ? 
C12 C11 N3 C9 133.3(6) . . . . ? 
C15 C11 N3 C9 8.7(6) . . . . ? 
N4 C11 N3 C8 44.8(7) . . . . ? 
C12 C11 N3 C8 -79.0(7) . . . . ? 
C15 C11 N3 C8 156.4(5) . . . . ? 
N2 C8 N3 C9 93.2(7) . . . . ? 
N2 C8 N3 C11 -50.1(7) . . . . ? 
O2 C10 N4 C11 -168.2(6) . . . . ? 
N6 C10 N4 C11 13.9(7) . . . . ? 
O2 C10 N4 C7 -25.6(9) . . . . ? 
N6 C10 N4 C7 156.5(5) . . . . ? 
N3 C11 N4 C10 101.4(6) . . . . ? 
C12 C11 N4 C10 -132.8(6) . . . . ? 
C15 C11 N4 C10 -9.3(6) . . . . ? 
N3 C11 N4 C7 -44.7(7) . . . . ? 
C12 C11 N4 C7 81.1(7) . . . . ? 
C15 C11 N4 C7 -155.4(5) . . . . ? 
N2 C7 N4 C10 -90.2(7) . . . . ? 
N2 C7 N4 C11 50.8(7) . . . . ? 
O1 C9 N5 C15 -167.7(6) . . . . ? 
N3 C9 N5 C15 15.5(6) . . . . ? 
O1 C9 N5 C19 -24.1(9) . . . . ? 
N3 C9 N5 C19 159.1(5) . . . . ? 
N6 C15 N5 C9 100.2(6) . . . . ? 
C16 C15 N5 C9 -133.7(6) . . . . ? 
C11 C15 N5 C9 -9.6(6) . . . . ? 
N6 C15 N5 C19 -45.9(7) . . . . ? 
C16 C15 N5 C19 80.2(7) . . . . ? 
C11 C15 N5 C19 -155.7(5) . . . . ? 
N7 C19 N5 C9 -93.0(7) . . . . ? 
N7 C19 N5 C15 49.2(7) . . . . ? 
O2 C10 N6 C20 22.0(9) . . . . ? 
N4 C10 N6 C20 -160.2(5) . . . . ? 
O2 C10 N6 C15 169.3(6) . . . . ? 
N4 C10 N6 C15 -12.8(7) . . . . ? 
N7 C20 N6 C10 94.7(7) . . . . ? 
N7 C20 N6 C15 -51.6(7) . . . . ? 
N5 C15 N6 C10 -103.8(6) . . . . ? 
C16 C15 N6 C10 128.7(6) . . . . ? 
C11 C15 N6 C10 6.6(6) . . . . ? 
N5 C15 N6 C20 47.1(6) . . . . ? 
C16 C15 N6 C20 -80.4(7) . . . . ? 
C11 C15 N6 C20 157.5(5) . . . . ? 
C19 N7 C21 C22 73.3(7) . . . . ? 
C20 N7 C21 C22 -160.1(5) . . . . ? 
C24 C22 C21 N7 54.5(8) . . . . ? 
C23 C22 C21 N7 -128.6(7) . . . . ? 
C23 C25 N8 C26 -1.2(10) . . . . ? 
C23 C25 N8 Cu1 172.0(5) . . . 3_667 ? 
C24 C26 N8 C25 -0.5(10) . . . . ? 
C24 C26 N8 Cu1 -174.0(6) . . . 3_667 ? 
O7 C27 N9 C29 3(2) . . . . ? 
O7 C27 N9 C28 179.0(13) . . . . ? 
  
loop_ 
 _geom_hbond_atom_site_label_D 
 _geom_hbond_atom_site_label_H 
 _geom_hbond_atom_site_label_A 
 _geom_hbond_distance_DH 
 _geom_hbond_distance_HA 
 _geom_hbond_distance_DA 
 _geom_hbond_angle_DHA 
 _geom_hbond_site_symmetry_A 
C20 H20A O7  0.97 2.58 3.484(12) 154.6 . 
C27 H27 O2  0.93 2.59 3.469(15) 158.7 . 
C26 H26 I1  0.93 3.00 3.833(6) 149.2 3_666 
C19 H19A O5  0.97 2.46 3.199(12) 132.4 3_767 
C14 H14C N8  0.96 2.58 3.35(3) 137.1 3_767 
C8 H8A O3  0.97 2.31 3.258(13) 166.0 4_566 
  
_diffrn_measured_fraction_theta_max    1.000 
_diffrn_reflns_theta_full              26.00 
_diffrn_measured_fraction_theta_full   1.000 
_refine_diff_density_max    0.857 
_refine_diff_density_min   -0.625 
_refine_diff_density_rms    0.114 
